# Supplementary material for: Improving the solar harvest of plasmonic organicsolar cells utilizing dielectric coatings
Source: Research Square preprint supplement (doi:10.21203/rs.3.rs-5030157/v1), 2024-10-09
Supplement: Supplementary file 1 [file 1c076745a1a828ca38e04d51.docx]

**Supporting information**

Improving the solar harvest of plasmonic organic
solar cells utilizing dielectric coatings

Simenew A. Mulat1, Fekadu G. Hone1, Nika Bekri2, 3, 4, Newayemedhin A. Tegegne1

1. Department of Physics, Addis Ababa University, P.O. Box 1176, Addis Ababa,
    Ethiopia
2. Department of Mathematics, Physics and Statistics, Addis Ababa Science and
    Technology University, P.O. Box 16417, Addis Ababa, Ethiopia
3. Sustainable energy Center of Excellence, Addis Ababa Science and Technology
    University, P.O. Box 16417, Addis Ababa , Ethiopia
4. Nanotechnology Center of Excellence, Addis Ababa Science and Technology
    University, P.O. Box 16417, Addis Ababa, Ethiopia

*Corresponding author(s). E-mail(s): [newaye.medhin@aau.edu.et](mailto:newaye.medhin@aau.edu.et);

Fig. S 1: Absorption, scattering and extinction cross section area of the Ag NSs with diameter of 10, 20, 30, 50, 80 and 100 nm.


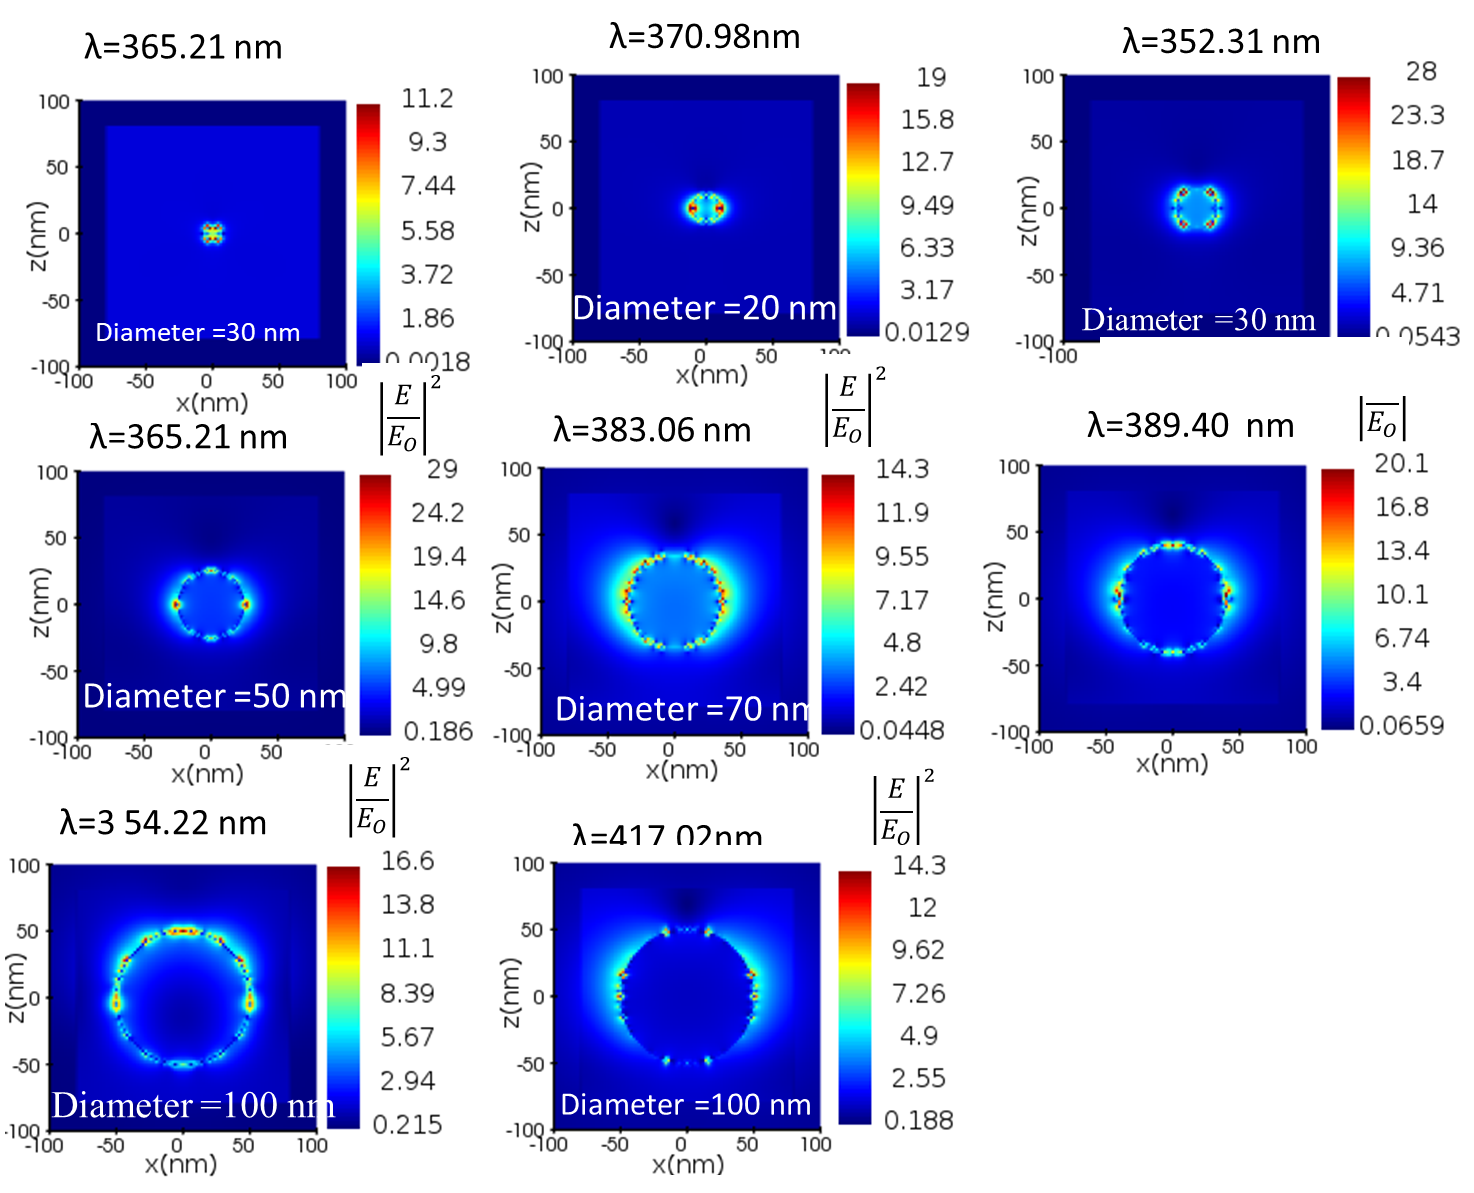


Fig. S 2: Electric field intensity calculated from frequency domain field around Ag NS at the LSPR mode for 10, 20, 30, 50, 80 and 100 nm diameters of Ag NSs.

Fig. S 3: Absorption cross section spectra of Ag NS with 70nm diameter coated by dielectric materials (a) Ag@TiO2, (b) Ag@SnO2, (c)Ag@ZnO and Ag@SiO2 with coating thickness of (0, 2, 5, 10, 35, 40 and 70 nm).

Fig. S 4: Scattering cross section spectra of Ag NS with 70 nm diameter coated by dielectric materials (a) Ag@TiO2, (b) Ag@SnO2, (c)Ag@ZnO and Ag@SiO2 with coating thickness of (0, 2, 5, 10, 35, 40 and 70 nm).


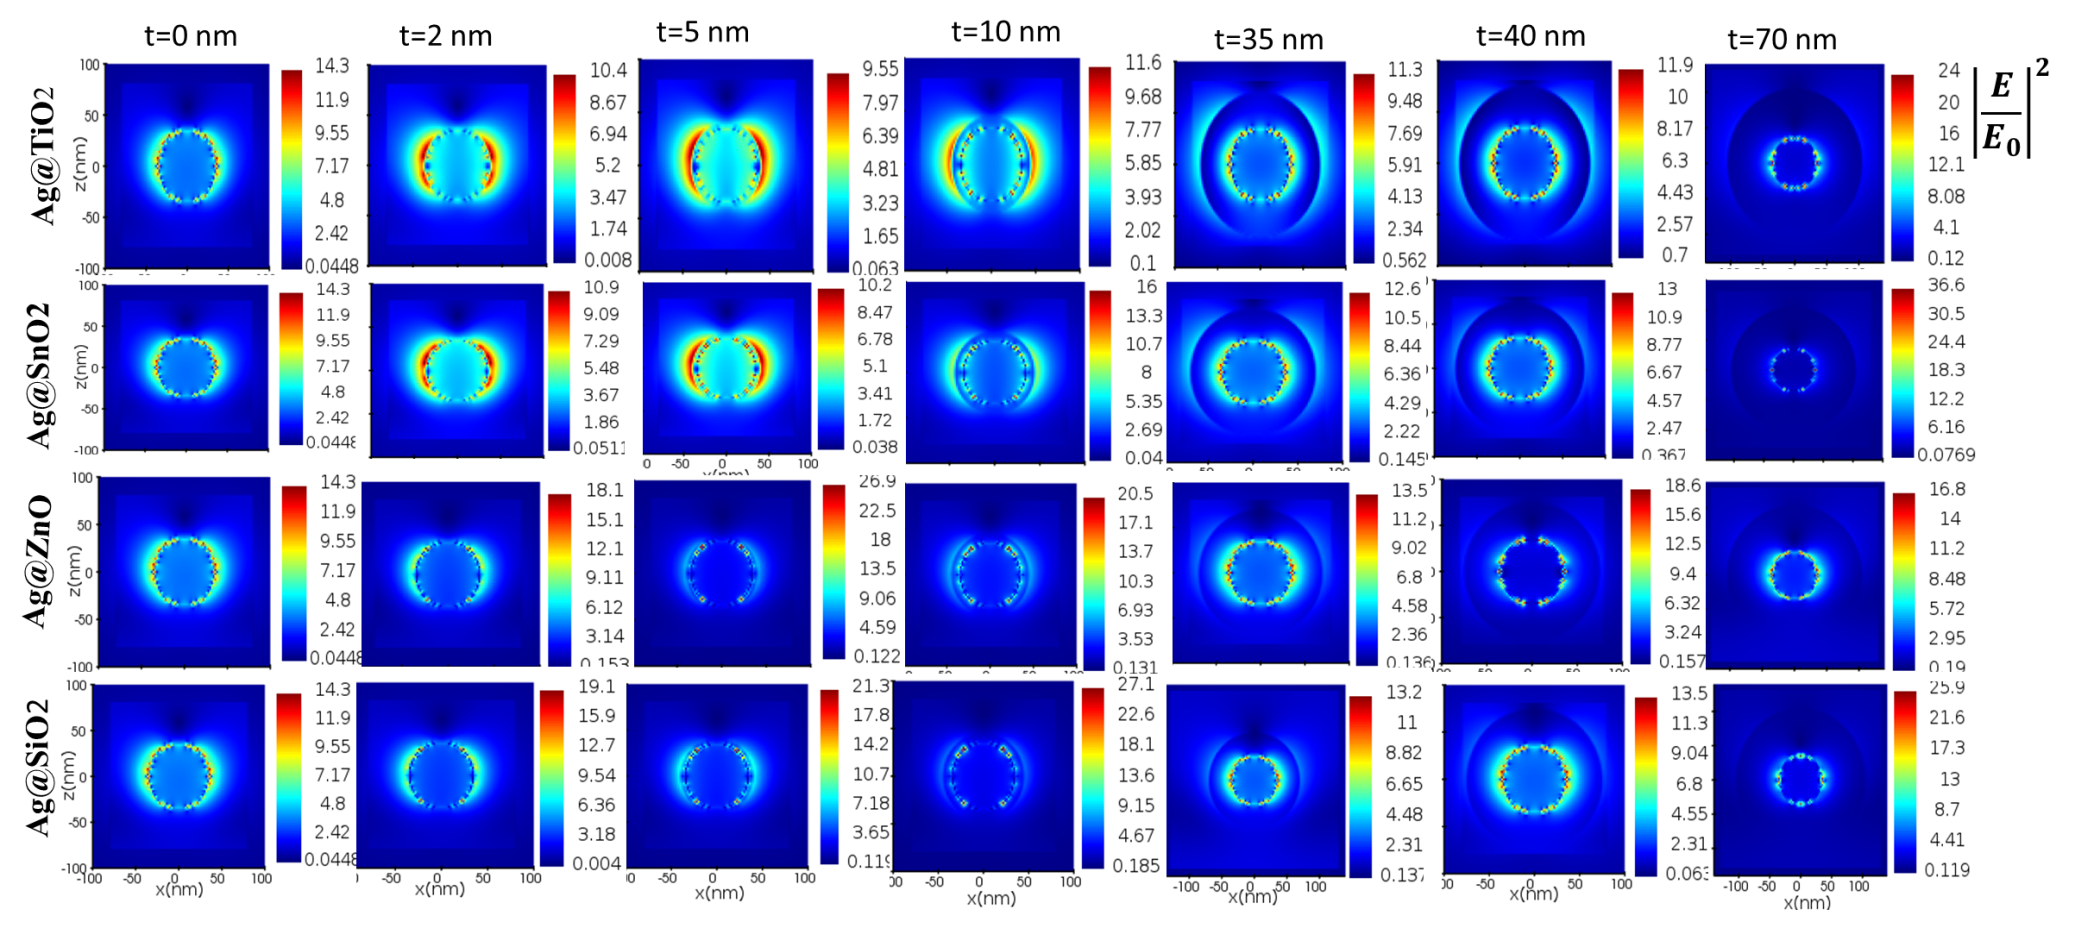


Fig. S 5: Electric filed intensity distribution measured from the frequency domain field monitor at the largest scattering wavelength for all proposed coating thickness.


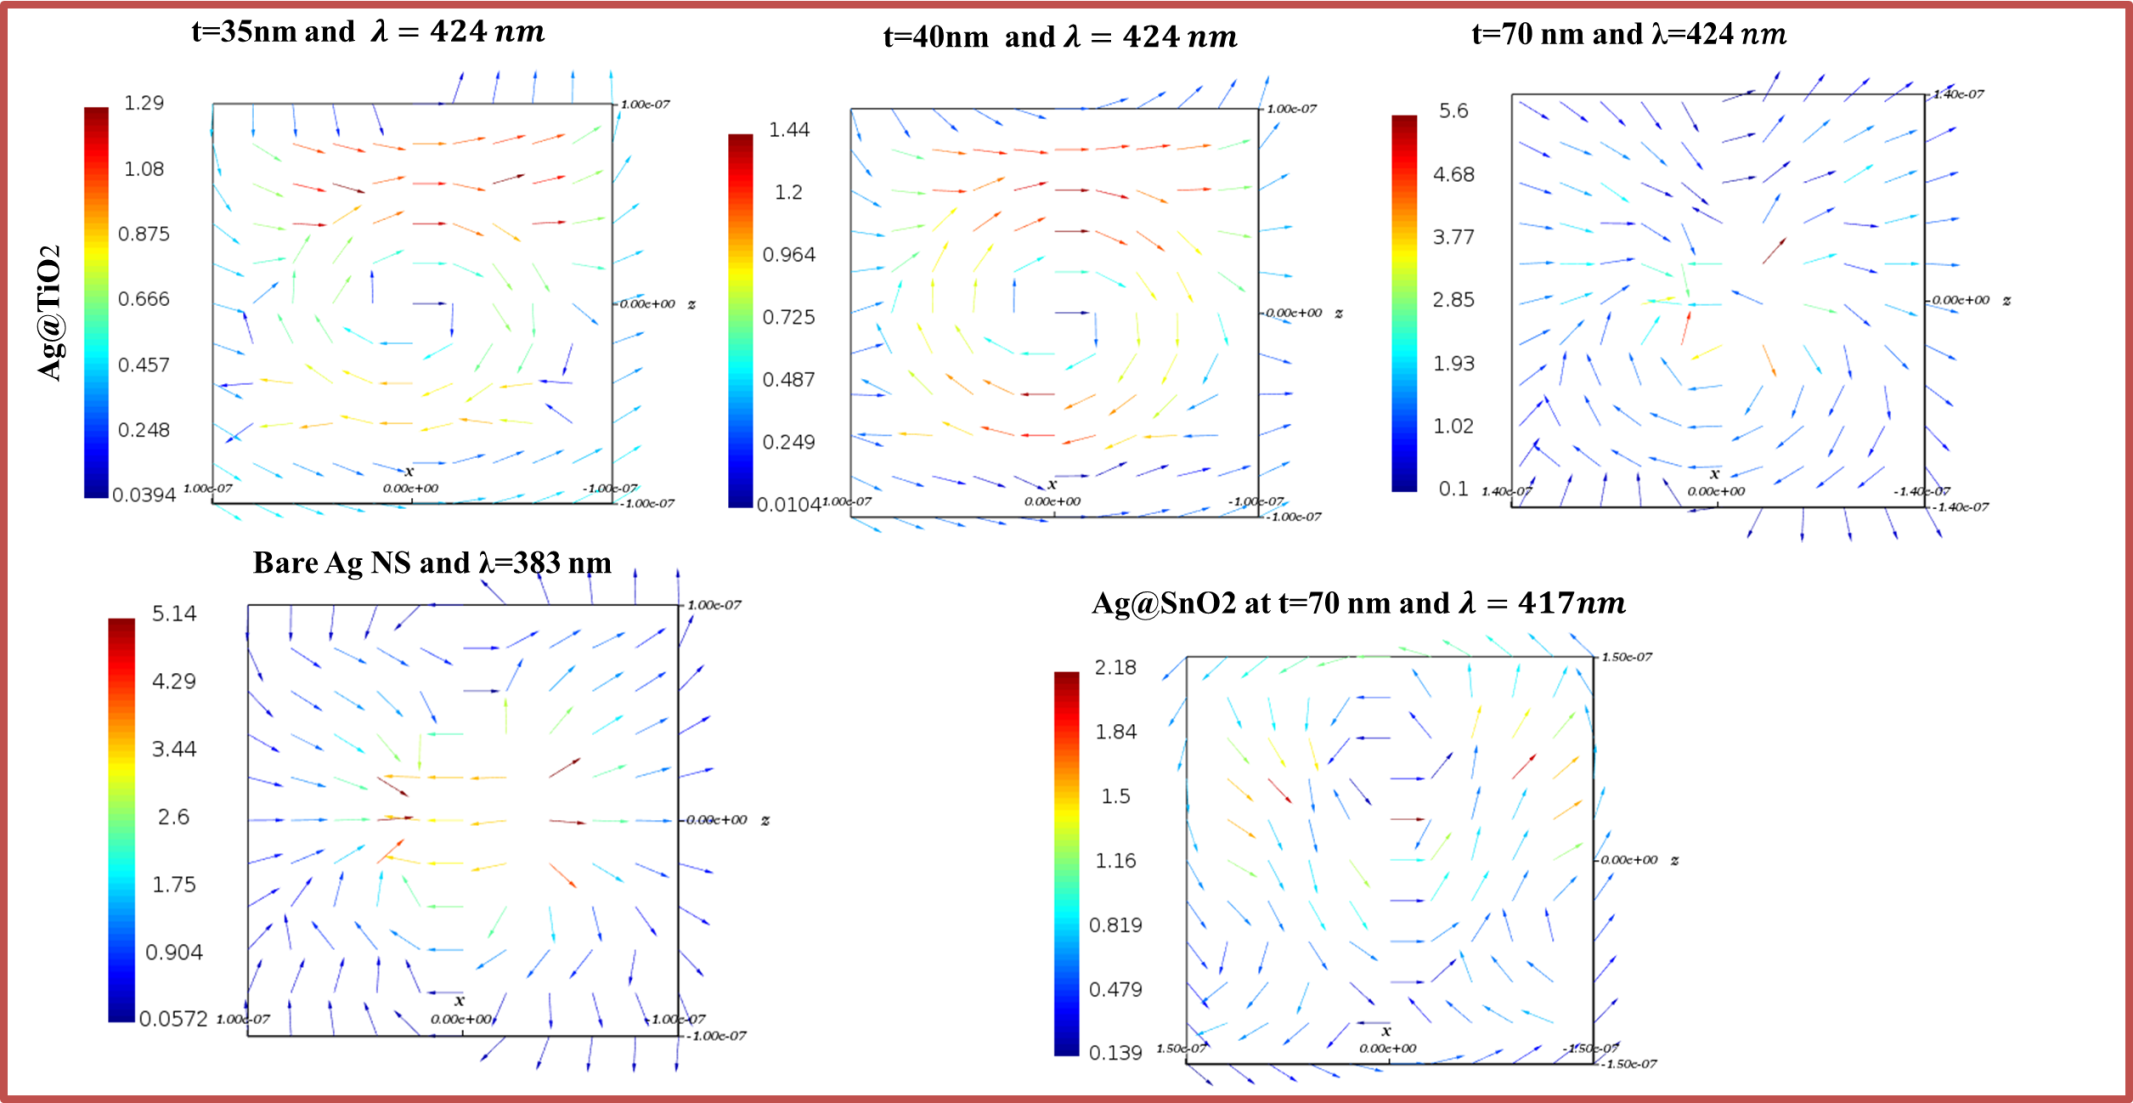


Fig. S 6: Electric field distribution intensity as vector for quadrupole LSPR mode for Ag NS coated by TiO2 and SnO2 and for bare Ag NS at the dipole mode for comparison.


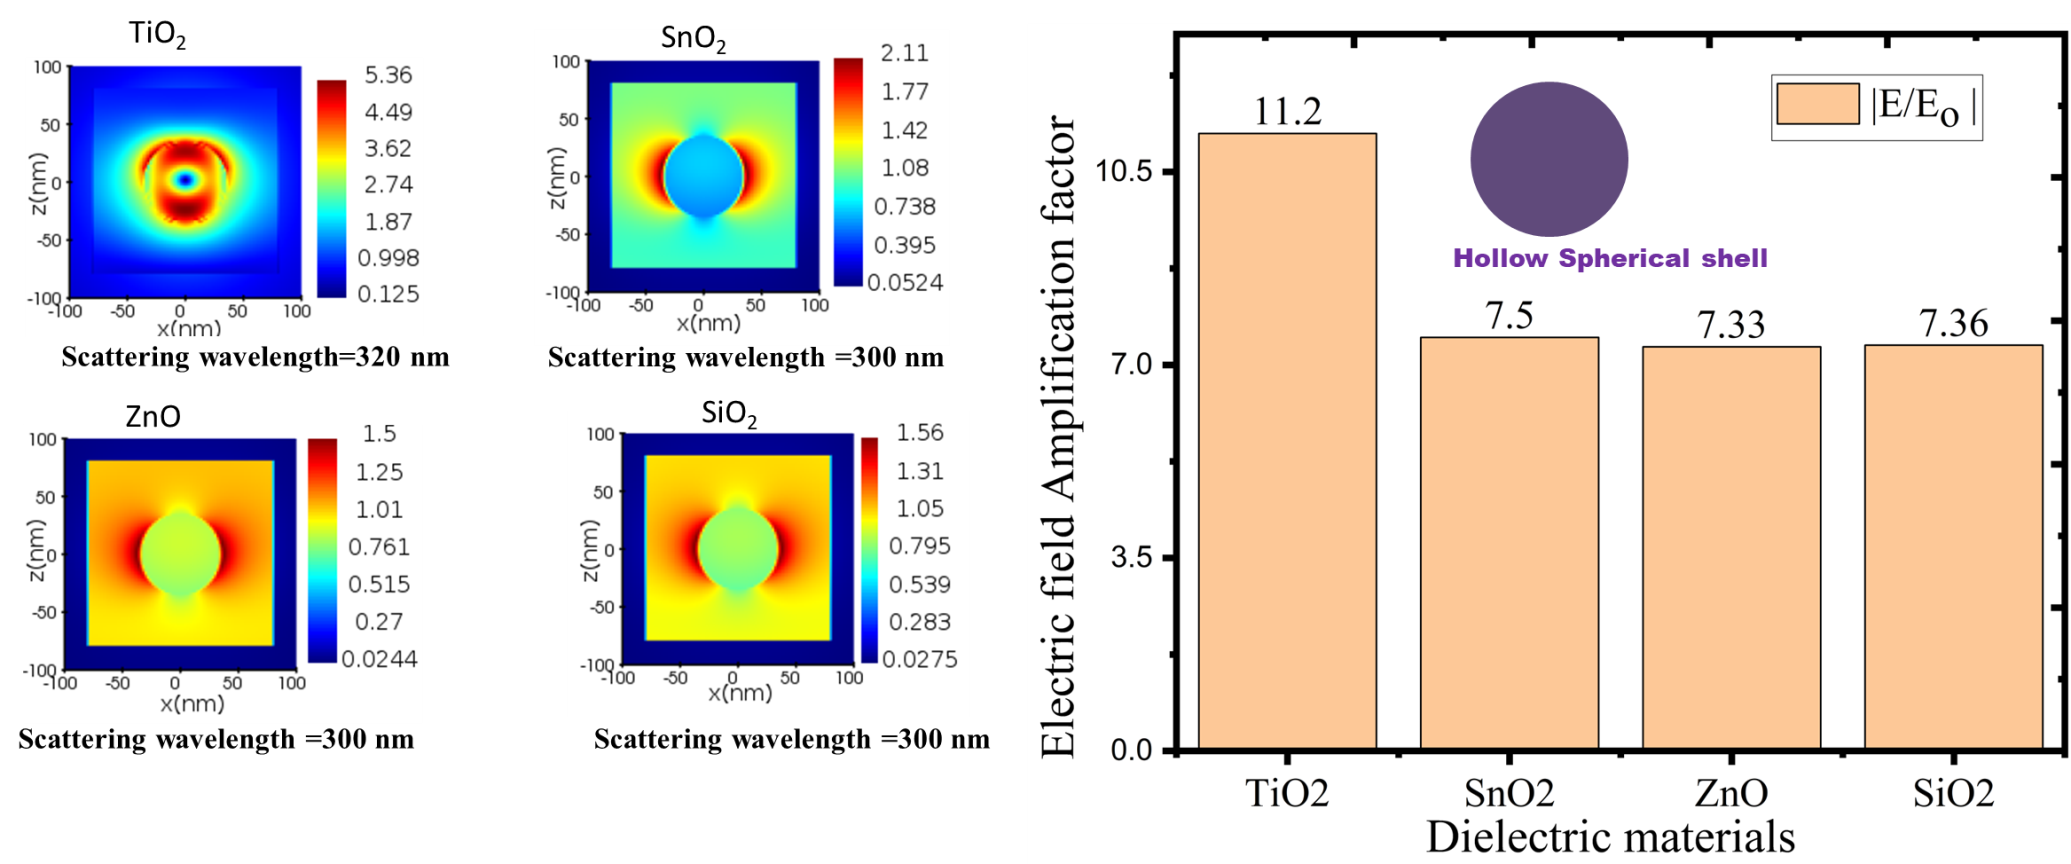


Scattering wavelength =320 nm

Fig. S 7: Represents (a) Electric field distribution intensity in spherical shape of dielectric material at the maximum scattering wavelength, (b) electric field amplification and (c) scattering of dielectric materials (TiO2, SnO2, ZnO and SiO2

Fig. S 8 :Ag@dielectric coating materials placed at the middle of the active layer (P3HT: PCBM)

Fig. S 9: Ag@dielectric coating materials placed at the interfacial layers of HTL and AL

Fig. S 10 Ag@dielectric coating materials placed at the interfacial layers of AL and ETL.

Fig. S 11: Ag@dielectric coating materials placed at the interfacial layers of ETL and ITO

Fig. S 12: PCE of Ag coated by different materials and positioned in different layers of OSC.
